# Supplementary material for: An online intervention for improving stroke survivors’ health-related quality of life: study protocol for a randomised controlled trial
Source: Springer Nature journal article supplement (doi:10.1186/s13063-019-3604-0), 2019-08-09
Supplement: MOESM3 [file 17054326]

### Consent Form

*Healthy Living After Stroke: An online intervention for improving stroke survivor health behaviours and quality of life.*

I agree to participate in the above research project and give my consent freely.

I understand that the project will be conducted as described in the Information Statement, a copy of which I have retained.

I have had all questions answered to my satisfaction.

I understand I can withdraw from the project at any time and do not have to give any reason for withdrawing.

#### I agree to:

- Being randomised to either receiving access to the online Prevent 2<sup>nd</sup> Stroke program (intervention group) or not (control group)
- Complete two telephone surveys over the next 6 months.
- Receive telephone calls, text, and email reminders as part of my study participation.
- Be contacted via by e-mail or letter if I am unable to be contacted by phone
- Allow the research team to collect my de-identified, stroke-related and hospital admissions data through the Australian Stroke Clinical Registry (AuSCR) database during the study period.
- Allow the research team to seek additional specific written consent (via supplementary consent forms) to collect administrative information regarding the costs associated to my stroke/TIA from Medicare, the Pharmaceutical Benefits Scheme (PBS), and hospital medical files.

***Please sign and date the form below as well as completing your contact details over the page. Return this form to the research team with the prepaid envelope provided***

Signature: \_\_\_\_\_

Date: \_\_\_\_\_

If you would **not** like to participate, and **would not like to be contacted any further**, please tick this box

### Your Contact Details

As you are aware, we will need to contact you upon receiving these details and again in 6 months' time to complete study surveys with you.

So that we can contact you, we would like you to give us your contact details.

Name: \_\_\_\_\_

Postal address: \_\_\_\_\_

\_\_\_\_\_

Home phone: \_\_\_\_\_ Mobile: \_\_\_\_\_

Email: \_\_\_\_\_

Best time for researcher to call: \_\_\_\_\_

Would you like a summary of the results of this study to be sent to you when the project is finished? **Yes / No** (*please circle one*)

### Nominated Carer/Friend/Family Member

I consent to assist in the survey as a proxy, and help the participant to participate in the study.

Name: \_\_\_\_\_

Signature: \_\_\_\_\_

Date: \_\_\_\_\_

This project has been approved by the University of Newcastle Human Research Ethics Committee [H-2017-0051].
